# Supplementary material for: GREAT v1.0: Global Real-time Early Assessment of Tsunamis
Source: Copernicus journal article supplement (doi:10.5194/gmd-2024-139), 2024-08-27
Supplement: Supplementary file [file gmd-2024-139-AC1-supplement.pdf]

---

**Reviewer 1**

We are very grateful to the reviewer for his/her constructive critiques and comments. In the following, we state the referee’s comments (in blue) followed by the response and actions taken (in black).

Add brief summaries to figure captions to clarify key observations, especially in Figures 8–9 and 16–17.

The captions are extended to include a summary of observations in Figures 8-9 for Tohoku 2011, 13-14 for Alaska 2018 and 16-17 for Tateyama 2009 events.

Four test cases are presented, highlighting different strengths of the methodology. While satisfactory agreement is observed for many DART buoy observations, some cases show larger deviations. How do the authors explain variations in model performance across different test cases? For example, were there consistent factors (like earthquake depth, distance from hydrophone) that influenced prediction accuracy? Could the authors include a summary table comparing key performance metrics (RMSE, computational time) to provide a clearer picture of strengths and limitations?

The following description has been added, along with two new tables and an extended table, to illustrate the model’s sensitivity to the source and its variations across different locations.

Among the four case studies discussed in the paper, Sumatra was triggered by a large oblique-slip earthquake with a significant vertical component and prolonged duration, whereas Tohoku and Tateyama involved thrust fault movements. Tohoku was a high-magnitude, long-duration bottom-shaking event, while Tateyama was weaker and shorter in duration. In contrast, the Alaska case was characterised by a strike-slip fault, dominated by horizontal motion and moderately shorter duration compared to Sumatra and Tohoku. Despite its large magnitude, the horizontal motion in Alaska resulted in only a minor tsunami. The vertical ground motion played a critical role in tsunami generation for Sumatra, Tohoku, and Tateyama, whereas the horizontal motion in Alaska limited tsunami generation. Consequently, model performance depends heavily on earthquake magnitude and vertical motion, as defined by the dip angle, with better results observed for large, vertically dominant ground motions. Furthermore, the accuracy of model predictions improves when the gauges are closer to the hydrophones. The reason is that AGWs are less dissipated due to interactions with the seafloor geometry, allowing the *inverse model* to better capture and estimate the fault geometry. (see Table 1).

From an observational perspective, ground-truth data for the Sumatra case are limited to a few selected locations, as summarized in Table 2, while DART buoy observations were available for the Tateyama, Tohoku, and Alaska cases, as outlined in Table 3. The accuracy of the model at observation locations is further influenced by two key factors. The first is the ratio of the shortest distance to the direct distance (SD/DD) between the epicentre and the observation points; a ratio closer to 1 indicates wave propagation over relatively consistent depths, aligning well with the assumptions of the *direct model*. The second is the proximity of the observations to the source, as observations closer to the epicentre, reflected

Table 1: Summary table for 4 case studies Ekström et al., 2012).

| Case                     | Sumatra      | Tateyama   | Tohoku     | Alaska      |
|--------------------------|--------------|------------|------------|-------------|
| Date                     | 26/12/2004   | 12/08/2009 | 11/03/2011 | 23/01/2018  |
| Time (GMT)               | 01:01:09     | 22:48:55   | 05:47:32   | 09:32:04    |
| Lon                      | 94.26        | 140.68     | 143.05     | -149.12     |
| Lat                      | 3.09         | 32.74      | 37.52      | 56.22       |
| Moment Magnitude (Mw)    | 9            | 6.6        | 9.1        | 7.9         |
| Depth [km]               | 28.6         | 55.2       | 20         | 33.6        |
| Half Duration [s]        | 95           | 4.8        | 70         | 22.3        |
| Strike [°]               | 329          | 55         | 203        | 257         |
| Dip [°]                  | 8            | 18         | 10         | 80          |
| Slip [°]                 | 110          | 130        | 88         | 4           |
| Type                     | Oblique-slip | Thrust     | Thrust     | Strike-slip |
| Hydrophone               | H08S1        | H11N1      | H11N1      | H11N1       |
| Lon                      | 71.01        | 166.89     | 166.89     | 166.89      |
| Lat                      | -6.34        | 19.71      | 19.71      | 19.71       |
| Distance [km]            | 2786         | 3005       | 3039       | 5427        |
| Acoustic Travel Time [s] | 1856         | 2003       | 2026       | 3485        |

Table 2: Direct Distance (DD), ratio between Shortest Distance to Direct Distance (SD/DD) and Travel Time (TT) for Sumatra 2004.

| Location      | Lat   | Lon   | DD [km] | SD/DD | TT [hr] |
|---------------|-------|-------|---------|-------|---------|
| Madras Bandar | 13.14 | 80.45 | 1885    | 1.08  | 3.0     |
| Batticaloa    | 7.71  | 81.69 | 1483    | 1.03  | 2.2     |
| S Maldives    | -0.74 | 73.20 | 2379    | 1.06  | 3.5     |
| Phuket        | 7.88  | 98.40 | 702     | 1.24  | 2.1     |
| Banda Aceh    | 5.55  | 95.32 | 298     | 1.85  | 1.1     |

in shorter travel times, tend to show higher model accuracy.

## Reference

Ekström, Göran, Meredith Nettles, and A. M. Dziewoński. "The global CMT project 2004–2010: Centroid-moment tensors for 13,017 earthquakes." *Physics of the Earth and Planetary Interiors* 200 (2012): 1-9.

Table 3: DART buoy stations legend: Direct Distance (DD), ratio between Shortest Distance to Direct Distance (SD/DD) and Travel Time (TT) for Tateyama 2009, Tohoku 2011 and Alaska 2018 events.

| Index | DART  | Lat    | Lon     | Tateyama |       |         | Tohoku  |       |         | Alaska  |       |         |
|-------|-------|--------|---------|----------|-------|---------|---------|-------|---------|---------|-------|---------|
|       |       |        |         | DD [km]  | SD/DD | TT [hr] | DD [km] | SD/DD | TT [hr] | DD [km] | SD/DD | TT [hr] |
| 1     | 21418 | 38.71  | 148.67  | 992      | 1.11  | 1.5     | 509     | 1.08  | 0.7     | 4867    | 1.07  | 6.2     |
| 2     | 21413 | 30.55  | 152.12  | 1137     | 1.09  | 1.7     | 1139    | 1.07  | 1.4     | 5317    | 1.07  | 6.7     |
| 3     | 52404 | 20.94  | 132.31  | 1544     | 1.01  | 2.4     | 2115    | 1.10  | 2.9     | 7385    | 1.06  | 9.4     |
| 4     | 21419 | 44.46  | 155.74  | 1851     | 1.08  | 2.6     | 1312    | 1.05  | 1.7     | 4003    | 1.09  | 5.2     |
| 5     | 52401 | 19.29  | 155.77  | 2145     | 1.10  | 3.0     | 2373    | 1.06  | 3.0     | 6097    | 1.05  | 7.7     |
| 6     | 21416 | 48.04  | 163.49  | 2567     | 1.04  | 3.4     | 2027    | 1.05  | 2.5     | 3287    | 1.13  | 4.4     |
| 7     | 52405 | 12.88  | 132.33  | 2364     | 1.06  | 3.4     | 2939    | 1.07  | 3.9     | 8110    | 1.06  | 10.3    |
| 8     | 52402 | 11.58  | 154.59  | 2771     | 1.04  | 3.7     | 3106    | 1.02  | 3.8     | 6885    | 1.06  | 8.7     |
| 9     | 21415 | 50.17  | 171.84  | 3214     | 1.05  | 4.3     | 2678    | 1.07  | 3.4     | 2645    | 1.13  | 3.6     |
| 10    | 21414 | 48.94  | 178.27  | 3602     | 1.05  | 4.7     | 3088    | 1.04  | 3.8     | 2315    | 1.11  | 3.1     |
| 11    | 52403 | 4.03   | 145.60  | 3247     | 1.13  | 4.8     | 3733    | 1.09  | 5.0     | 8120    | 1.06  | 10.5    |
| 12    | 46413 | 48.67  | -174.59 | 4107     | 1.04  | 5.3     | 3602    | 1.04  | 4.5     | 1896    | 1.10  | 2.5     |
| 13    | 46408 | 49.63  | -169.87 | 4460     | 1.05  | 5.8     | 3950    | 1.05  | 4.9     | 1554    | 1.06  | 2.1     |
| 14    | 46402 | 50.44  | -165.02 | 4812     | 1.05  | 6.2     | 4297    | 1.04  | 5.3     | 1219    | 1.07  | 1.7     |
| 15    | 46403 | 52.65  | -156.93 | 5374     | 1.06  | 6.9     | 4844    | 1.05  | 6.1     | 626     | 1.04  | 0.9     |
| 16    | 52406 | -5.33  | 165.08  | 4979     | 1.07  | 7.0     | 5283    | 1.05  | 7.0     | 7990    | 1.04  | 10.5    |
| 17    | 46409 | 55.30  | -148.50 | 5904     | 1.07  | 7.7     | 5359    | 1.07  | 6.8     | 89      | 1.05  | 0.1     |
| 18    | 46410 | 57.50  | -144.00 | 6148     | 1.09  | 8.2     | 5594    | 1.09  | 7.4     | 356     | 1.20  | 0.6     |
| 19    | 51407 | 19.63  | -156.51 | 6371     | 1.05  | 8.3     | 6119    | 1.06  | 7.9     | 4091    | 1.09  | 5.6     |
| 20    | 55012 | -15.80 | 158.50  | 5739     | 1.07  | 8.4     | 6145    | 1.07  | 8.6     | 9350    | 1.08  | 12.7    |
| 21    | 51425 | -9.50  | -176.25 | 6574     | 1.08  | 8.7     | 6726    | 1.05  | 8.4     | 7701    | 1.04  | 9.9     |
| 22    | 46419 | 48.76  | -129.62 | 7332     | 1.04  | 9.8     | 6801    | 1.03  | 8.9     | 1544    | 1.02  | 2.4     |
| 23    | 46404 | 45.86  | -128.78 | 7521     | 1.04  | 10.0    | 7000    | 1.04  | 9.1     | 1809    | 1.02  | 2.7     |
| 24    | 46407 | 42.60  | -128.90 | 7666     | 1.05  | 10.1    | 7161    | 1.04  | 9.3     | 2078    | 1.06  | 3.1     |
| 25    | 46411 | 39.35  | -127.01 | 7971     | 1.06  | 10.5    | 7477    | 1.04  | 9.7     | 2464    | 1.04  | 3.6     |
| 26    | 46412 | 32.25  | -120.70 | 8860     | 1.05  | 11.5    | 8385    | 1.05  | 10.7    | 3435    | 1.05  | 5.0     |
| 27    | 55023 | -14.80 | 153.59  | 5478     | 1.08  | 8.0     | 5921    | 1.07  | 8.2     | 9493    | 1.10  | 13.3    |
| 28    | 56003 | -15.02 | 117.99  | 5829     | 1.06  | 8.9     | 6403    | 1.07  | 9.4     | 11563   | 1.06  | 15.9    |
